# Supplementary material for: Dangshen Huangjiu prevents gastric mucosal injury and inhibits Akt/NF-κB pathway
Source: Royal Society of Chemistry journal article supplement (doi:10.1039/d3fo00489a), 2023-01-01

## Supplementary information :

**Fig.S1** Evaluation of the indicators in rats during CNAG modeling. (A) Body weight change in rats. (B) Serum G-17 and PGI levels of rats in the model group at week 8. (C) Morphological and histopathological changes of rat gastric tissue during modeling (green arrows indicate gastric mucosa exudation and detachment, black arrows indicate congestion and edema). Data is expressed as means  $\pm$  SD (n=8). \* $P < 0.05$ , \*\* $P < 0.01$  vs. NC group.

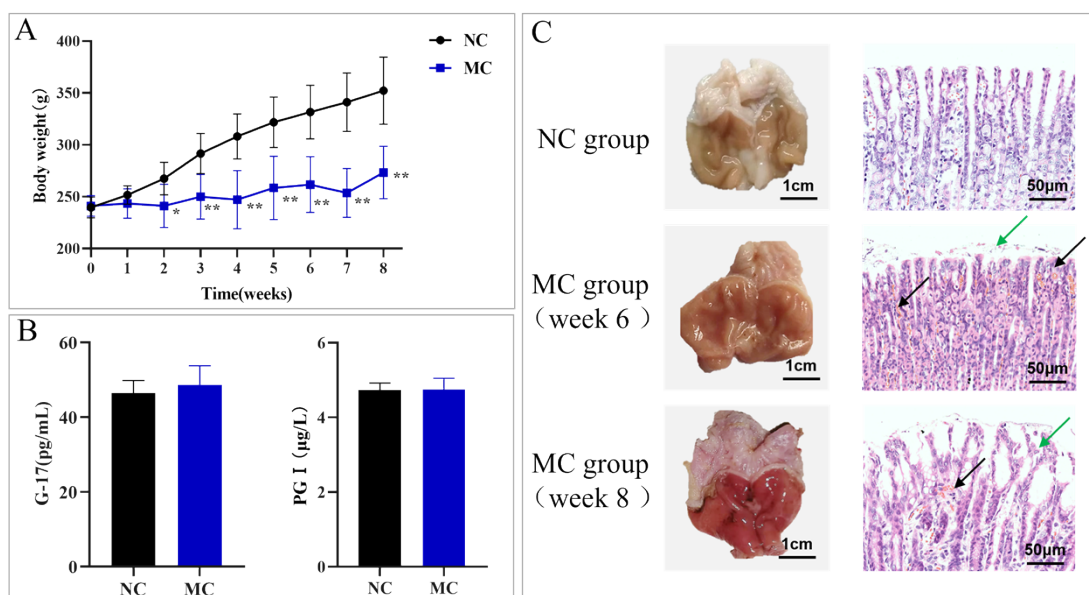

Supplement: d3fo00489a1.pdf [file d3fo00489a1.pdf]
